# Supplementary material
Source: PubMed Central journal article supplement (PMC7682371)
Supplement: pnas.2015032117.sapp.pdf [file pnas.2015032117.sapp.pdf]

Supporting Information – Appendix

OVERKILL, GLACIAL HISTORY, AND THE EXTINCTION  
OF NORTH AMERICA’S ICE AGE MEGAFUNA

David J. Meltzer  
Department of Anthropology  
Southern Methodist University  
Dallas, TX 75275

**Table S1:** North American extinct genera, and currently accepted species within those genera, with the North American Land Mammal Age(s) of their first and last appearances. Taxa in shaded rows went extinct during the Pleistocene, but before the Rancholabrean.

| Genus                 | Species                   | First appearance | Last appearance | References    |
|-----------------------|---------------------------|------------------|-----------------|---------------|
| <i>Pampatherium</i>   | <i>P. cf. mexicanum</i>   | ?                | Rancholabrean   | 1, 2          |
| <i>Holmesina</i>      | <i>H. floridanus</i>      | Blancan          | Irvingtonian    | 3–5           |
|                       | <i>H. septentrionalis</i> | Irvingtonian     | Rancholabrean   |               |
| <i>Glyptotherium</i>  | <i>G. texanum</i>         | Blancan          | Irvingtonian    | 2, 6, 7       |
|                       | <i>G. cylindricum</i>     | Rancholabrean    | Rancholabrean   |               |
| <i>Megalonyx</i>      | <i>M. leptostomus</i>     | Blancan          | Blancan?        | 3, 8–11       |
|                       | <i>M. wheatleyi</i>       | Blancan          | Irvingtonian    |               |
|                       | <i>M. jeffersonii</i>     | Rancholabrean    | Rancholabrean   |               |
| <i>Eremotherium</i>   | <i>E. eomigrans</i>       | Blancan          | Blancan         | 12            |
|                       | <i>E. laurillardi</i>     | Rancholabrean    | Rancholabrean   |               |
| <i>Nothrotheriops</i> | <i>N. texana</i>          | Irvingtonian     | Irvingtonian    | 3, 11, 13     |
|                       | <i>N. shastensis</i>      | Irvingtonian     | Rancholabrean   |               |
| <i>Paramylodon</i>    | <i>cf. P. garbanii</i>    | Blancan          | Blancan         | 3, 14, 15     |
|                       | <i>P. harlani</i>         | Blancan          | Rancholabrean   |               |
| <i>Brachyprotoma</i>  | <i>B. obtusata</i>        | Irvingtonian     | Rancholabrean   | 16            |
| <i>Cuon</i>           | <i>C. alpinus</i>         | ?                | Rancholabrean   | 17            |
| <i>Tremarctos</i>     | <i>T. floridanus</i>      | ?                | Rancholabrean   | 18            |
| <i>Arctodus</i>       | <i>A. pristinus</i>       | Blancan          | Irvingtonian    | 3, 18–20      |
|                       | <i>A. simus</i>           | ?                | Rancholabrean   |               |
| <i>Smilodon</i>       | <i>S. gracilis</i>        | Blancan          | Irvingtonian    | 21–24         |
|                       | <i>S. fatalis</i>         | Irvingtonian     | Rancholabrean   |               |
| <i>Homotherium</i>    | <i>H. serum</i>           | Rancholabrean    | Rancholabrean   | 3, 22, 24, 25 |
|                       | <i>H. ischyryus</i>       | Blancan          | Blancan         |               |
| <i>Miracinonyx</i>    | <i>M. inexpectatus</i>    | Blancan          | Irvingtonian    | 3, 21, 26, 27 |
|                       | <i>M. trumani</i>         | Rancholabrean    | Rancholabrean   |               |
| <i>Castoroides</i>    | <i>C. leiseyorum</i>      | Irvingtonian     | Irvingtonian?   | 28, 29        |

|                        |                            |               |               |               |
|------------------------|----------------------------|---------------|---------------|---------------|
|                        | <i>C. ohioensis</i>        | Irvingtonian  | Rancholabrean |               |
|                        | <i>C. dilophidus</i>       | Irvingtonian  | Rancholabrean |               |
| <i>Hydrochoerus</i>    | <i>H. holmesi</i>          | Blancan       | Rancholabrean | 30            |
| <i>Neochoerus</i>      | <i>N. pinckneyi</i>        | Blancan       | Rancholabrean | 30            |
| <i>Aztlanolagus</i>    | <i>A. agilis</i>           | Blancan       | Rancholabrean | 3, 31, 32     |
| <i>Equus</i>           | <i>E. scotti</i>           | Irvingtonian  | Rancholabrean | 33, 34        |
|                        | <i>E. conversidens</i>     | Irvingtonian  | Rancholabrean |               |
|                        | <i>E. occidentalis</i>     | Irvingtonian  | Rancholabrean |               |
| <i>Haringtonhippus</i> | <i>H. francisci</i>        | Irvingtonian  | Rancholabrean | 33, 35        |
| <i>Tapirus</i>         | <i>T. haysii</i>           | Blancan       | Irvingtonian  | 3, 36         |
|                        | <i>T. lundeliusi</i>       | Blancan       | Irvingtonian  |               |
|                        | <i>T. veroensis</i>        | Irvingtonian  | Rancholabrean |               |
| <i>Mylohyus</i>        | <i>M. nasutus</i>          | Irvingtonian  | Rancholabrean | 3, 37         |
| <i>Platygonus</i>      | <i>P. bicalcaratus</i>     | Blancan       | Blancan       | 3, 37–39      |
|                        | <i>P. texanus</i>          | Blancan       | Blancan       |               |
|                        | <i>P. pearcei</i>          | Blancan       | Blancan       |               |
|                        | <i>P. vetus</i>            | Blancan       | Irvingtonian  |               |
|                        | <i>P. compressus</i>       | Rancholabrean | Rancholabrean |               |
| <i>Camelops</i>        | <i>C. minidokae</i>        | Irvingtonian  | Irvingtonian  | 3, 38, 40, 41 |
|                        | <i>C. hesternus</i>        | Irvingtonian  | Rancholabrean |               |
| <i>Hemiauchenia</i>    | <i>H. gracilis</i>         | Blancan       | Blancan       | 3, 38, 41, 42 |
|                        | <i>H. macrocephala</i>     | Blancan       | Rancholabrean |               |
| <i>Paleolama</i>       | <i>P. mirifica</i>         | Blancan       | Rancholabrean | 3, 41         |
| <i>Navahoceros</i>     | <i>N. fricki</i>           | Irvingtonian  | Rancholabrean | 3, 38, 43     |
| <i>Cervalces</i>       | <i>C. roosevelti</i>       | ?             | ?             | 44, 45        |
|                        | <i>C. scotti</i>           | Rancholabrean | Rancholabrean |               |
| <i>Capromeryx</i>      | <i>C. arizonensis</i>      | Blancan       | Irvingtonian  | 3, 43, 46–48  |
|                        | <i>C. tauntonensis</i>     | Blancan       | Rancholabrean |               |
|                        | <i>C. furcifer (minor)</i> | Irvingtonian  | Rancholabrean |               |
| <i>Tetrameryx</i>      | <i>T. irvingtonensis</i>   | Irvingtonian  | Irvingtonian  | 3             |
|                        | <i>T. shuleri</i>          | Irvingtonian  | Rancholabrean |               |
| <i>Stockoceros</i>     | <i>S. onusrosagris</i>     | Irvingtonian  | Rancholabrean | 38, 43        |
| <i>Saiga</i>           | <i>S. tatarica</i>         | Rancholabrean | Rancholabrean | 3             |
| <i>Euceratherium</i>   | <i>E. collinum</i>         | Irvingtonian  | Rancholabrean | 49, 50        |
| <i>Bootherium</i>      | <i>B. bombifrons</i>       | Rancholabrean | Rancholabrean | 49            |
| <i>Mixotoxodon</i>     | <i>M. cf. laensis</i>      | Rancholabrean | Rancholabrean | 51            |
| <i>Cuvieronius</i>     | <i>C. hyodon</i>           | Irvingtonian  | Rancholabrean | 3, 52         |
| <i>Mammut</i>          | <i>M. americanum</i>       | Blancan       | Rancholabrean | 3             |
|                        | <i>M. pacificus</i>        | Irvingtonian  | Rancholabrean | 53            |
| <i>Mammuthus</i>       | <i>M. trongontherii</i>    | Irvingtonian  | Rancholabrean | 54–56         |

|  |                       |              |               |  |
|--|-----------------------|--------------|---------------|--|
|  | <i>M. primigenius</i> | Irvingtonian | Rancholabrean |  |
|  | <i>M. columbi</i>     | Irvingtonian | Rancholabrean |  |

## References

1. I. Ferrusquía-Villafranca, *et al.*, “Quaternary mammals, people, and climate change: a view from southern North America” in *Climate Change and Human Responses*, Vertebrate Paleobiology and Paleoanthropology., G. Monks, Ed. (Springer Netherlands, 2017), pp. 27–67.
2. J. I. Mead, S. L. Swift, R. S. White, H. G. McDonald, A. Baez, Late Pleistocene (Rancholabrean) *Glyptodont* and *Pamphotherium* (Xenarthra, Cingulata) from Sonora, Mexico. *Rev. Mex. Cienc. Geológicas* **24**, 439–449 (2007).
3. C. Bell, E. Lundelius, Barnosky, A., “The Blancan, Irvingtonian, and Rancholabrean Mammal Ages” in *Late Cretaceous and Cenozoic Mammals of North America*, (Columbia University Press, 2004), pp. 232–314.
4. H. G. McDonald, Paleocology of extinct Xenarthrans and the Great American Biotic Interchange. *Bull. Fla. Mus. Nat. Hist.* **45**, 313–333 (2005).
5. R. Hulbert, S. D. Webb, *The fossil vertebrates of Florida* (University Press of Florida, 2001).
6. A. E. Zurita, D. D. Gillette, F. Cuadrelli, A. A. Carlini, A tale of two clades: comparative study of *Glyptodon* Owen and *Glyptotherium* Osborn (Xenarthra, Cingulata, Glyptodontidae). *Geobios* **51**, 247–258 (2018).
7. D. D. Gillette, *et al.*, Ontogeny and sexual dimorphism of *Glyptotherium texanum* (Xenarthra, Cingulata) from the Pliocene and Pleistocene (Blancan and Irvingtonian NALMA) of Arizona, New Mexico, and Mexico. *J. Mamm. Evol.* **23**, 133–154 (2016).
8. J. W. Hoganson, H. G. McDonald, First report of Jefferson’s Ground Sloth (*Megalonyx jeffersonii*) in North Dakota: Paleobiogeographical and paleoecological significance. *J. Mammal.* **88**, 73–80 (2007).
9. B. W. Schubert, R. Wm. Graham, H. G. McDonald, E. C. Grimm, T. W. Stafford, Latest Pleistocene paleoecology of Jefferson’s ground sloth (*Megalonyx jeffersonii*) and elk-moose (*Cervalces scotti*) in northern Illinois. *Quat. Res.* **61**, 231–240 (2004).
10. L. M. Lyon, C. Powell, H. G. McDonald, T. J. Gaudin, Premaxillae of the extinct Megalonychid sloths *Acratocnus*, *Neocnus*, and *Megalonyx*, and their phylogenetic implications (Mammalia, Xenarthra). *J. Mamm. Evol.* **23**, 121–132 (2016).
11. H. G. McDonald, R. G. Dundas, J. C. Chatters, Taxonomy, paleoecology and taphonomy of ground sloths (Xenarthra) from the Fairmead Landfill locality (Pleistocene: Irvingtonian) of Madera County, California. *Quat. Res.* **79**, 215–227 (2013).
12. H. G. McDonald, E. L. Lundelius, The giant ground sloth *Eremotherium laurillardii* (Xenarthra, Megatheriidae) in Texas. *Mus. North. Ariz. Bull.* **65**, 407–421 (2009).
13. H. G. McDonald, G. T. Jefferson, Distribution of Pleistocene *Nothrotheriops* (Xenarthra, Nothrotheriidae) in North America. *Nat. Hist. Mus. Los Angel. Cty. Sci. Ser.* **41**, 313–331 (2008).

14. H. G. McDonald, S. Pelikan, Mammoths and mylodonts: Exotic species from two different continents in North American Pleistocene faunas. *Quat. Int.* **142–143**, 229–241 (2006).
15. H. G. McDonald, G. S. Morgan, Ground sloths of New Mexico. *N. M. Mus. Nat. Hist. Sci. Bull.* **53**, 652–663 (2011).
16. E. Anderson, “The carnivora from Porcupine Cave” in *Biodiversity Response to Climate Change in the Middle Pleistocene: The Porcupine Cave Fauna from Colorado*, A. D. Barnosky, Ed. (University of California Press, 2004), pp. 141–154.
17. A. Iyengar, *et al.*, Phylogeography, genetic structure, and diversity in the dhole (*Cuon alpinus*). *Mol. Ecol.* **14**, 2281–2297 (2005).
18. J. Arroyo-Cabrales, E. Johnson, R. W. Graham, V. Perez-Crespo, North American Ursid (Mammalia:Ursidae) defaunation from Pleistocene to Recent. *Cranium* **33**, 51–56 (2016).
19. B. W. Schubert, Late Quaternary chronology and extinction of North American giant short-faced bears (*Arctodus simus*). *Quat. Int.* **217**, 188–194 (2010).
20. L. H. Soibelzon, B. W. Schubert, The largest known bear, *Arctotherium angustidens*, from the early Pleistocene Pampean region of Argentina: with a discussion of size and diet trends in bears. *J. Paleontol.* **85**, 69–75 (2011).
21. M. E. Lewis, “The postcranial morphology of *Smilodon*” in *Smilodon: The Iconic Sabertooth*, L. Werdelin, H. G. McDonald, C. A. Shaw, Eds. (Johns Hopkins University Press, 2018), pp. 171–195.
22. M. Anton, *Sabertooth* (Indiana University Press, 2013).
23. H. G. McDonald, “A short history of becoming the iconic Sabertooth” in *Smilodon: The Iconic Sabertooth*, L. Werdelin, H. G. McDonald, C. A. Shaw, Eds. (Johns Hopkins University Press, 2018), pp. 1–13.
24. L. Werdelin, T. Flink, “The phylogenetic context of *Smilodon*” in *Smilodon: The Iconic Sabertooth*, L. Werdelin, H. G. McDonald, C. A. Shaw, Eds. (Johns Hopkins University Press, 2018), pp. 14–29.
25. M. Antón, M. J. Salesa, A. Galobart, Z. J. Tseng, The Plio-Pleistocene scimitar-toothed felid genus *Homotherium fabrini*, 1890 (Machairodontinae, Homotherini): diversity, palaeogeography and taxonomic implications. *Quat. Sci. Rev.* **96**, 259–268 (2014).
26. B. Van Valkenburgh, F. Grady, B. Kurten, The Plio-Pleistocene cheetah-like cat (*Miracinonyx inexpectatus*) of North America. *J. Vertebr. Paleontol.* **10**, 434–454 (1990).
27. A. Shabel, A. D. Barnosky, T. Van Leuven, F. Bibi, M. Kaplan, “Irvingtonian mammals from the badger room in Porcupine Cave” in *Biodiversity Response to Climate Change in the Middle Pleistocene: The Porcupine Cave Fauna from Colorado*, A. D. Barnosky, Ed. (University of California Press, 2004), pp. 295–317.
28. T. Plint, F. J. Longstaffe, G. Zazula, Giant beaver palaeoecology inferred from stable isotopes. *Sci. Rep.* **9**, 7179 (2019).

29. R. Hulbert, A. Kerner, G. S. Morgan, Taxonomy of the Pleistocene giant beaver *Castoroides* (Rodentia: Castoridae) from the southeastern United States. *Bull. Fla. Mus. Nat. Hist.* **53**, 26–43 (2014).
30. G. S. Morgan, The Great American Biotic Interchange in Florida. *Bull. Fla. Mus. Nat. Hist.* **45**, 271–311 (2005).
31. C. Baxter, “Leporidae of the DMNH Velvet room excavations and Mark’s Sink” in *Biodiversity Response to Climate Change in the Middle Pleistocene: The Porcupine Cave Fauna from Colorado*, A. D. Barnosky, Ed. (University of California Press, 2004), pp. 164–168.
32. J. A. Moretti, Early Pleistocene leporids (Mammalia, Lagomorpha) of Roland Springs Ranch Locality 1 and the rise of North American Quaternary leporines. *Quat. Int.* **492**, 23–39 (2018).
33. L. Rook, *et al.*, Mammal biochronology (Land Mammal Ages) around the world From Late Miocene to Middle Pleistocene and major events in horse evolutionary history. *Front. Ecol. Evol.* **7**, 278 (2019).
34. E. C. Scott, “Pliocene and Pleistocene horses from Porcupine Cave” in *Biodiversity Response to Climate Change in the Middle Pleistocene: The Porcupine Cave Fauna from Colorado*, A. D. Barnosky, Ed. (University of California Press, 2004), pp. 264–279.
35. P. D. Heintzman, *et al.*, A new genus of horse from Pleistocene North America. *eLife* **6** (2017).
36. R. Hulbert, A new early Pleistocene tapir (Mammalia: Perissodactyla) from Florida, with a review of Blancan tapirs from the state. *Bull. Fla. Mus. Nat. Hist.* **49**, 67–126 (2010).
37. N. J. Czaplewski, Pleistocene Peccaries (Mammalia: Tayassuidae) from Western Oklahoma. *Southwest. Nat.* **57**, 112–117 (2012).
38. J. I. Mead, L. Taylor, “Pleistocene (Irvingtonian) Artiodactyla from Porcupine Cave” in *Biodiversity Response to Climate Change in the Middle Pleistocene: The Porcupine Cave Fauna from Colorado*, A. D. Barnosky, Ed. (University of California Press, 2004), pp. 280–292.
39. D. R. Prothero, J. Grenader, A new primitive species of the Flat-Headed Peccary *Platygonus* (Tayassuidae, Artiodactyla, Mammalia) from the Late Miocene of the High Plains. *J. Paleontol.* **86**, 1021–1031 (2012).
40. J. Baskin, R. Thomas, A review of *Camelops* (Mammalia, Artiodactyla, Camelidae), a giant llama from the Middle and Late Pleistocene (Irvingtonian and Rancholabrean) of North America. *Hist. Biol.* **28**, 120–127 (2016).
41. L. T. Yann, L. R. G. DeSantis, P. L. Koch, E. L. Lundelius, Dietary ecology of Pleistocene camelids: Influences of climate, environment, and sympatric taxa. *Palaeogeogr. Palaeoclimatol. Palaeoecol.* **461**, 389–400 (2016).
42. J. A. Meachen, A new species of *Hemiauchenia* (Artiodactyla, Camelidae) from the late Blancan of Florida. *Bull. Fla. Mus. Nat. Hist.* **45**, 435–447 (2005).
43. G. S. Morgan, A. Harris, Pliocene and Pleistocene vertebrates of New Mexico. *N. M. Mus. Nat. Hist. Sci. Bull.* **68**, 233–248 (2015).

44. C. Widga, T. L. Fulton, L. D. Martin, B. Shapiro, *Homotherium serum* and *Cervalces* from the Great Lakes Region, USA: geochronology, morphology and ancient DNA. *Boreas* **41**, 546–556 (2012).
45. R. C. Glotzhober, H. G. McDonald, Partial Skeleton of an Elk-moose, *Cervalces scotti*, from Chippewa Lake, Medina County, Ohio. *PaleoAmerica* **1**, 332–342 (2015).
46. S. Lucas, G. S. Morgan, Pleistocene mammals of Arizona. *N. M. Mus. Nat. Hist. Sci. Bull.* **29**, 152–157 (2005).
47. J. K. Morgan, N. H. Morgan, A new species of *Capromeryx* (Mammalia: Artiodactyla) from the Taunton Local Fauna of Washington, and the correlation with other Blancan faunas of Washington and Idaho. *J. Vertebr. Paleontol.* **15**, 160–170 (1995).
48. R. White, G. S. Morgan, *Capromeryx* (Artiodactyla: Antilocapridae) from the Rancholabrean Tramperos Creek fauna, Union County, New Mexico, with a review of the occurrence and paleobiology of *Capromeryx* in the Rancholabrean of New Mexico. *N. M. Mus. Nat. Hist. Sci. Bull.* **53**, 641–651 (2011).
49. P. F. Campos, *et al.*, Ancient DNA analyses exclude humans as the driving force behind late Pleistocene musk ox (*Ovibos moschatus*) population dynamics. *Proc. Natl. Acad. Sci.* **107**, 5675–5680 (2010).
50. M. Kropf, J. I. Mead, R. Scott Anderson, Dung, diet, and the paleoenvironment of the extinct shrub-ox (*Euceratherium collinum*) on the Colorado Plateau, USA. *Quat. Res.* **67**, 143–151 (2007).
51. E. L. Lundelius, V. M. Bryant, R. Mandel, K. J. Thies, A. Thoms, The first occurrence of a toxodont (Mammalia, Notoungulata) in the United States. *J. Vertebr. Paleontol.* **33**, 229–232 (2013).
52. S. Lucas, *Cuvieronius* (Mammalia, Proboscidea) from the Neogene of Florida. *N. M. Mus. Nat. Hist. Sci. Bull.* **44**, 31–38 (2008).
53. A. C. Dooley, *et al.*, *Mammut pacificus* sp. nov., a newly recognized species of mastodon from the Pleistocene of western North America. *PeerJ* **7**, e6614 (2019).
54. D. Chang, *et al.*, The evolutionary and phylogeographic history of woolly mammoths: a comprehensive mitogenomic analysis. *Sci. Rep.* **7**, 44585 (2017).
55. A. M. Lister, On the type material and evolution of North American mammoths. *Quat. Int.* **443**, 14–31 (2017).
56. A. M. Lister, A. V. Sher, Evolution and dispersal of mammoths across the Northern Hemisphere. *Science* **350**, 805–809 (2015).
